# Supplementary material for: A Homozygous Loss-of-Function Mutation in MSH5 Abolishes MutSγ Axial Loading and Causes Meiotic Arrest in NOA-Affected Individuals
Source: MDPI journal article supplement (doi:10.3390/ijms23126522), 2022-06-10
Supplement: s1 [file s1]

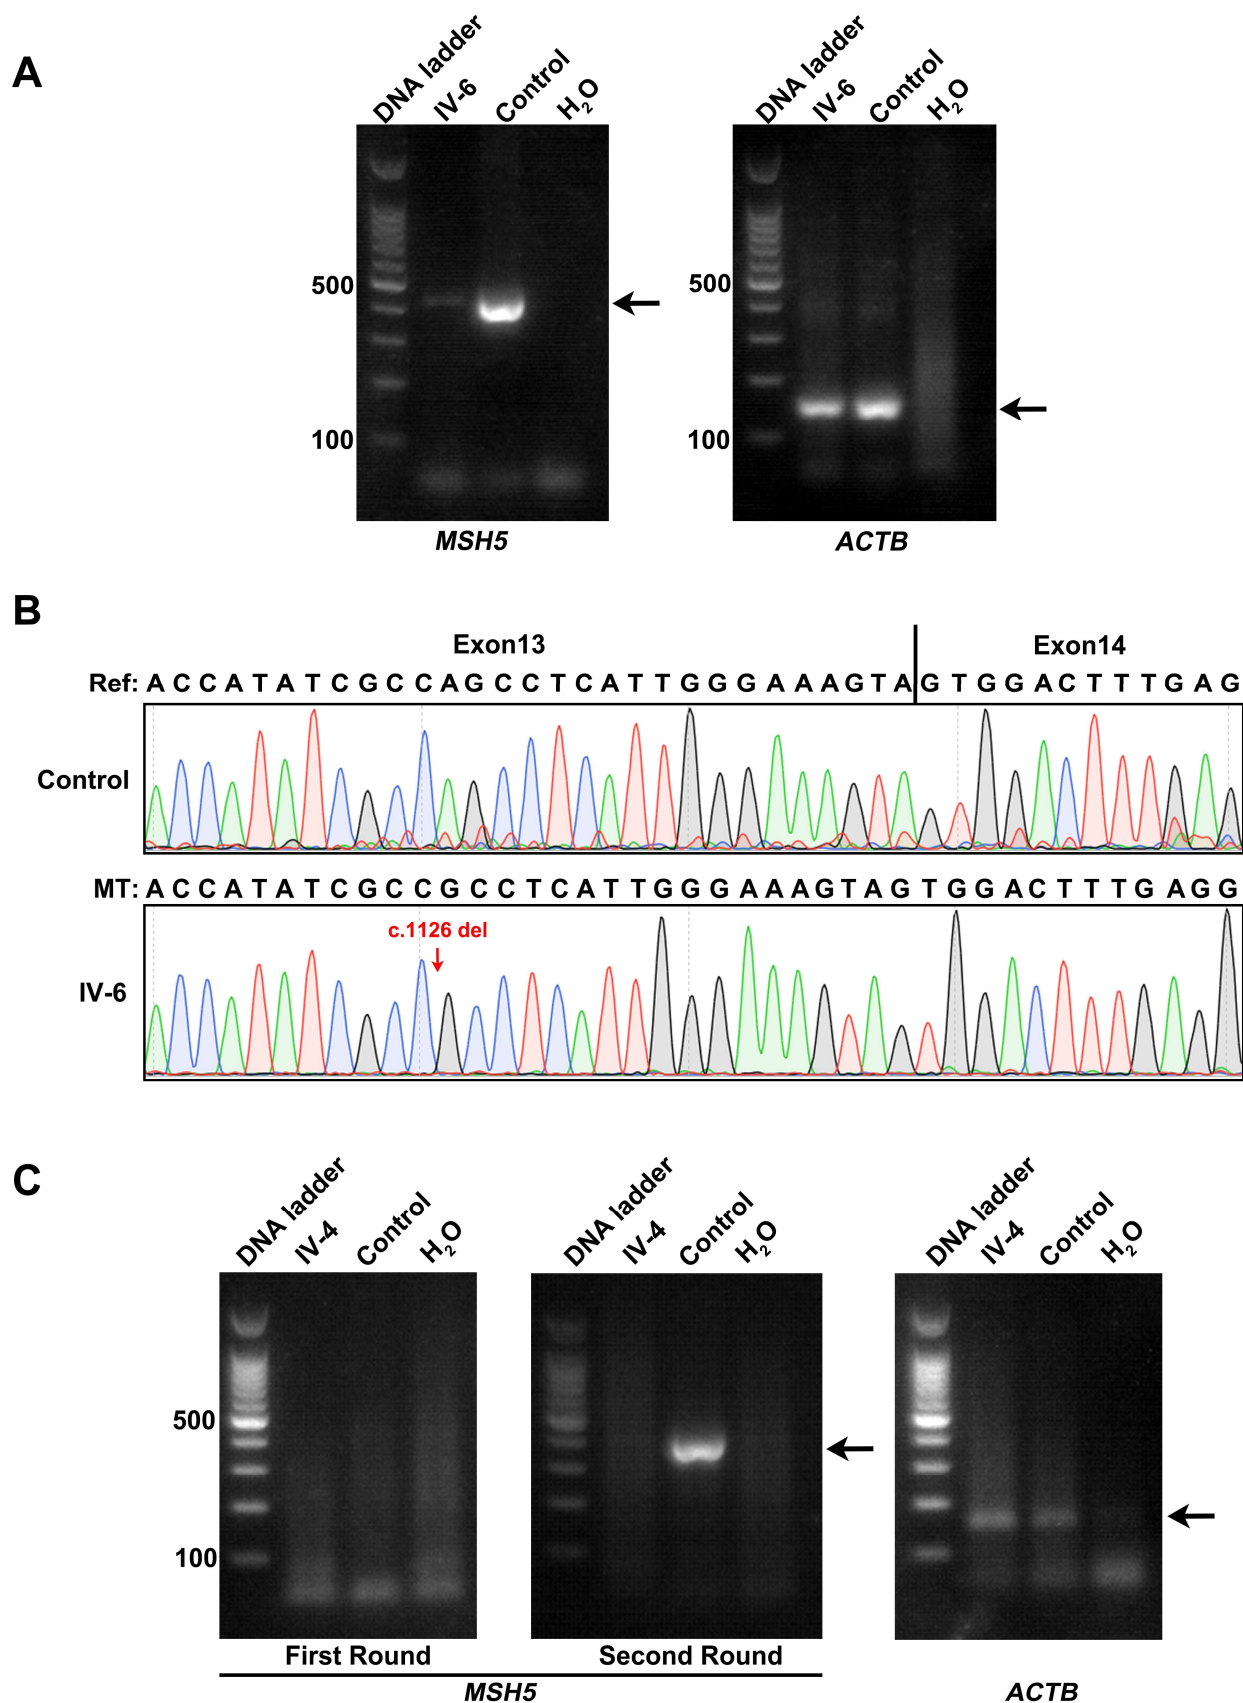

**Figure S1. Detection of *MSH5* mutation at the cDNA level by RT-PCR and Sanger sequencing.**

(A) RT-PCR analysis of testicular samples from a male control and the patient IV-6. *ACTB* served as a loading control. Arrows indicate targeted bands. (B) Sanger sequencing chromatograms of testicular cDNA products amplified from a male control and the patient IV-6. The red arrow indicates the 1-bp deletion in *MSH5*. (C) RT-PCR analysis of blood samples from a male control and the patient IV-4. *ACTB* served as a loading control. Arrows indicate targeted bands.

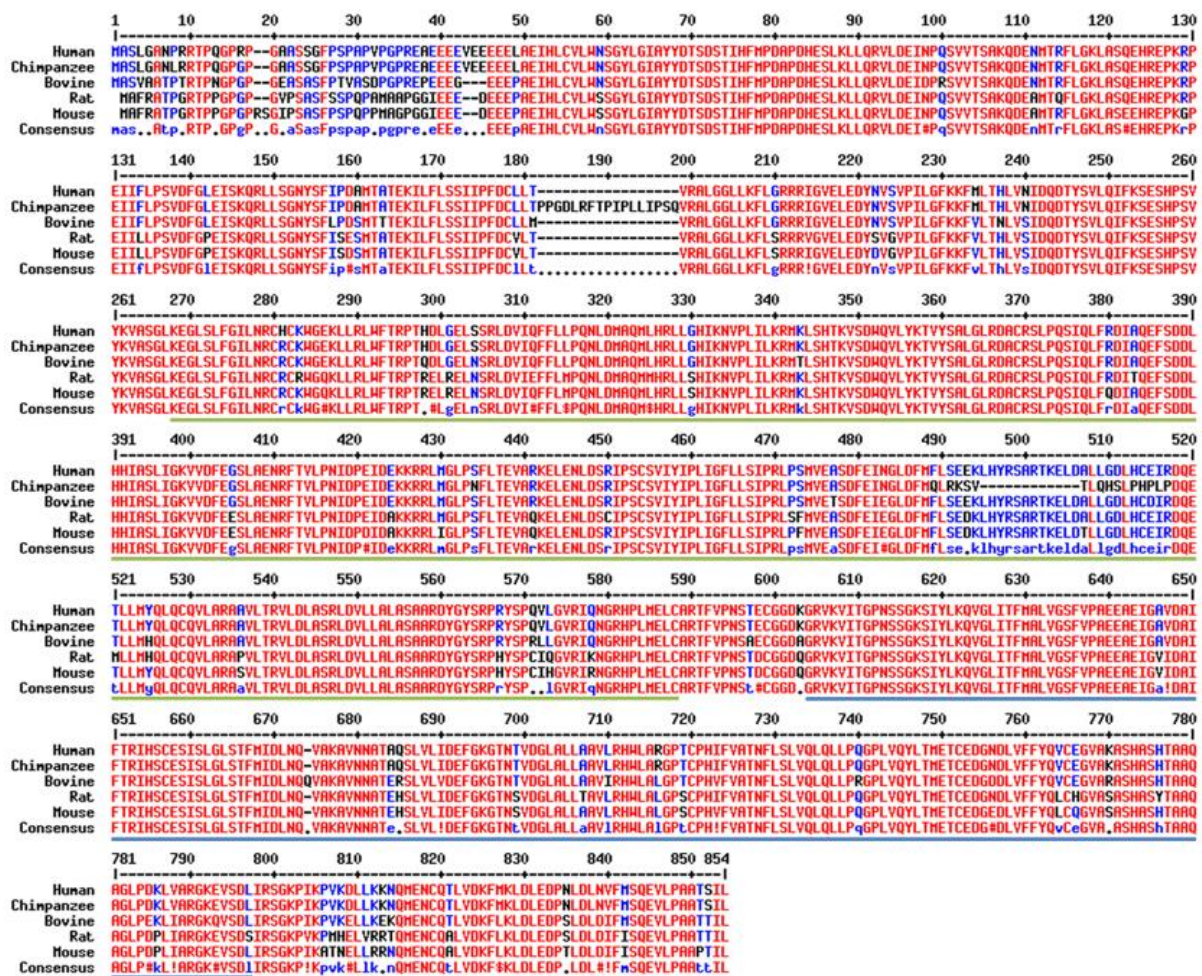

Figure S2. Alignment of MSH5 protein sequences across different organisms.

MSH5 residues that are identical among different species appear in red and as uppercase letters in the consensus line. Residues highly similar among different species are indicated by red symbols (!, any one of I and V; #, any one of N, D, and E). Unconserved residues are written in blue or as asterisks in the consensus line. Green line highlights the DNA-binding domain. Blue line highlights the ATPase domain. The alignment was performed using the online software MultAlin (<http://multalin.toulouse.inra.fr/multalin/multalin.html>).

**Table S1. Primers used in this study.**

| Information                                                | Name              | Sequence(5'- 3')       | Product size (bp) |
|------------------------------------------------------------|-------------------|------------------------|-------------------|
| Primers for human gDNA amplification and Sanger sequencing | hMSH5-720-F1      | CCTATCACCACTCAACCCG    | Control: 403      |
|                                                            | hMSH5-720-R1      | TCCTGTTCTCAGCTCTCCT    | Mutant: 402       |
| Primers for human cDNA amplification and Sanger sequencing | MSH5-720-cDNA-CF1 | ATCTGGACATGGCTCAGATG   | Control: 408      |
|                                                            | MSH5-720-cDNA-CR1 | ATGAAGGAATACGGGAGTCC   | Mutant: 407       |
| Primers used for RT-PCR ( <i>MSH5</i> )                    | hMSH5-qRT-CF1     | TACGAGTGCCAAACAGGATG   | 146               |
|                                                            | hMSH5-qRT-CR1     | CAGAAAGGAGGCGTTGTTTG   |                   |
| Primers used for RT-PCR ( <i>ACTB</i> )                    | hACTB-qPCR-F      | AATGAGCTGCGTGTGGCTC    | 148               |
|                                                            | hACTB-qPCR-R      | ATAGCACAGCCTGGATAGCAAC |                   |

**Table S2. Antibodies used in this study.**

| <b>Primary antibodies</b>   |             |                  |                       |                 |
|-----------------------------|-------------|------------------|-----------------------|-----------------|
| <b>Target</b>               | <b>Host</b> | <b>Company</b>   | <b>Catalog number</b> | <b>Dilution</b> |
| SYCP3                       | Mouse       | Proteintech      | 66409-1-Ig            | IF: 1:100       |
| MSH5                        | Rabbit      | Sigma-Aldrich    | HPA062688             | IF: 1:50        |
| MSH4                        | Rabbit      | Abcam            | ab58666               | IF: 1:50        |
| SIX6OS1                     | Guinea pig  | Custom-made      | -                     | IF: 1:100       |
| $\gamma$ H2AX               | Rabbit      | NOVUS            | NB100-384             | IF:1:5000       |
| <b>Secondary antibodies</b> |             |                  |                       |                 |
| <b>Target</b>               | <b>Host</b> | <b>Company</b>   | <b>Catalog number</b> | <b>Dilution</b> |
| Mouse (Alexa-488)           | Goat        | Molecular Probes | A-21121               | IF: 1:100       |
| Rabbit (Alexa-555)          | Donkey      | Molecular Probes | A31572                | IF: 1:200       |
| Guinea Pig (Alexa-555)      | Goat        | Thermofisher     | A21435                | IF: 1:200       |
